# Supplementary material
Source: PubMed Central journal article supplement (PMC3442580)
Supplement: supp_tpc.111.094417_tpc094417SupplementalData.pdf [file supp_tpc.111.094417_tpc094417SupplementalData.pdf]

...

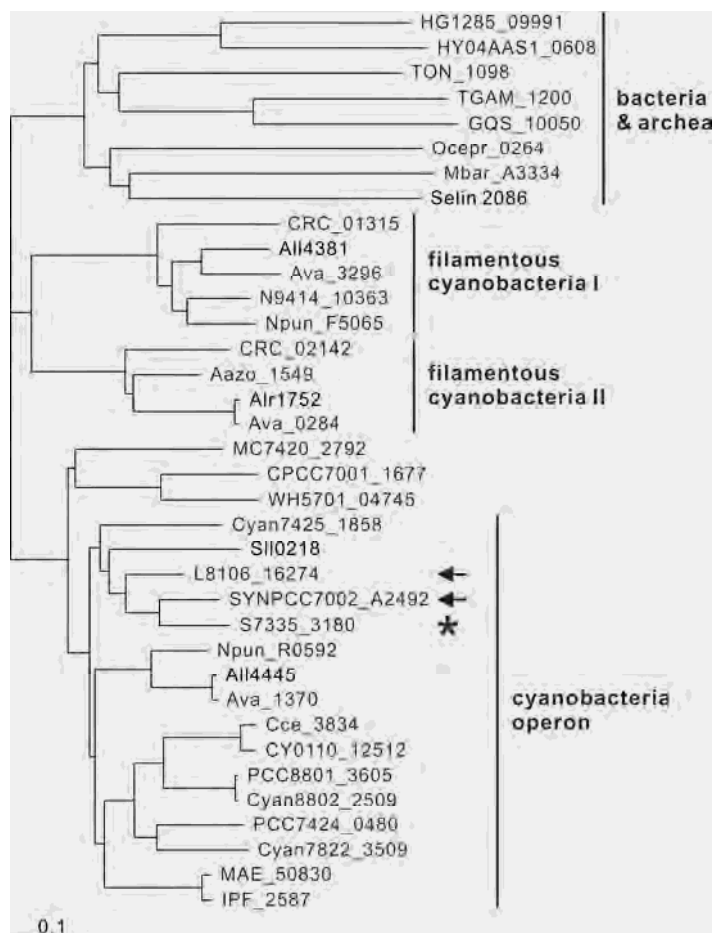

**Supplemental Figure 1.** Phylogenetic analysis of Sll0218 in cyanobacteria, bacteria and archaea.

Amino acid sequences were retrieved from CyanoBase (<http://bacteria.kazusa.or.jp/cyanobase/>) and NCBI (<http://www.ncbi.nlm.nih.gov/>), and were named according to their locus tags. The exceptions are indicated. The arrows show the sequences with high identity with Sll0218 but are missing the *flv4* and *flv2* genes. The star indicates a Sll0218 homolog, which is not located between the *flv4* and the *flv2* genes.

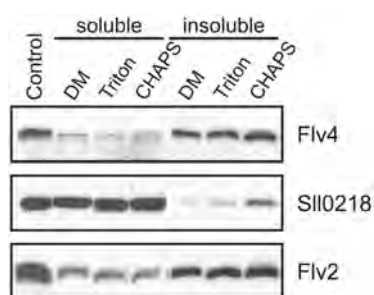

**Supplemental Figure 2.** Solubility of the Flv4, SII0218 and Flv2 proteins by nonionic and zwitterionic detergents.

Total membrane of the air level CO<sub>2</sub> grown WT cells was isolated in Buffer B and solubilized by 2% DM, 1% Triton X-100 or 2% CHAPS according to BN PAGE protocol in Methods. The soluble and insoluble proteins were separated by centrifugation. The pellet was resuspended in water. Both soluble and insoluble materials were solubilized by Laemmli sample buffer with 6 M urea, and subjected to SDS-PAGE. Control represents the total membrane directly solubilized with the Laemmli solubilization buffer. The Flv4, SII0218 and Flv2 proteins were detected by Western blot.

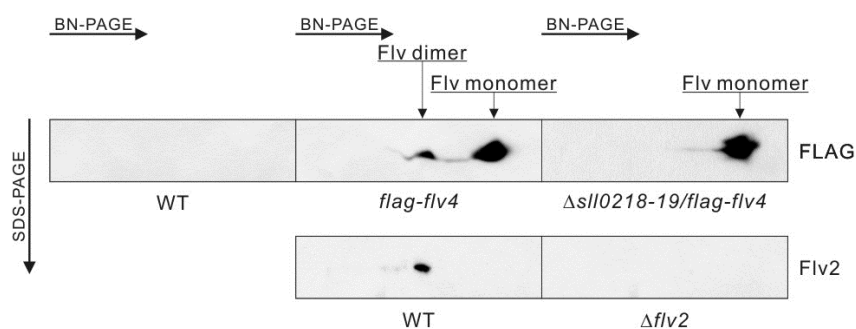

**Supplemental Figure 3.** BN/SDS-PAGE demonstrating the heterodimer formation by Flv2 and Flv4.

Soluble fractions were isolated from WT,  $\Delta flv2$ , *flag-flv4* and  $\Delta sll0218-19/flag-flv4$  cells, and the protein complexes were separated by BN gel. The 2D BN/SDS-PAGE and immunoblotting with the FLAG and the Flv2 antibody were subsequently performed. Only the sections of the SDS-PAGE gels corresponding to the molecular masses of the Flv2 and Flv4 proteins are shown.

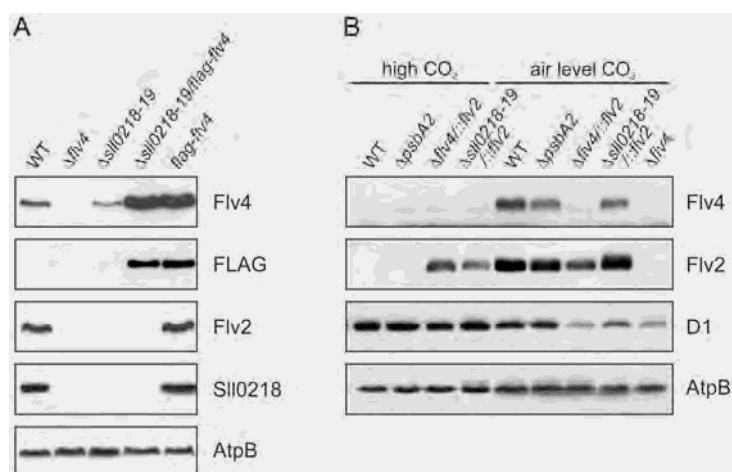

**Supplemental Figure 4.** Expression of Flv4, Sll0218 and Flv2 proteins in WT, *flv* mutants, the *flag-flv4* strains and the *flv2* complemented strains.

**(A)** Expression of the Flv4, FLAG-Flv4, Sll0218 and Flv2 proteins in WT, *flv* mutants and the *flag-flv4* strains.

**(B)** Expression of the Flv4, Flv2 and D1 proteins in WT,  $\Delta$ *psbA2*,  $\Delta$ *flv4::flv2* and  $\Delta$ *sll0218-19::flv2* strains.

Total membranes were isolated from the WT and various *flv* mutants, and proteins separated by SDS-PAGE. The expression of the Flv4, FLAG-Flv4, Flv2, Sll0218, D1, PsaB proteins was detected by specific antibodies. ATPase  $\beta$  subunit represents a loading control.

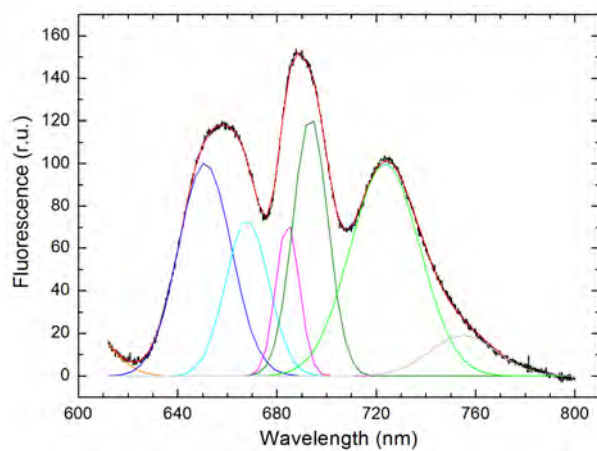

**Supplemental Figure 5.** An example of the Gaussian sub-band deconvolution of 77K fluorescence emission spectra excited at 580 nm in *Synechocystis* WT cells. The black line shows the original spectrum, the red line shows the fitted spectrum by the Gaussian deconvolution. The other color lines are the Gaussian deconvolution sub-bands from the original spectrum.

| 20H1         | β2                | β3      | β4         | β5     | β6    | β7    | β8       | α1                      |
|--------------|-------------------|---------|------------|--------|-------|-------|----------|-------------------------|
|              | 20                | 30      | 40         | 50     | 60    | 70    |          |                         |
| 20H1         | VYWTGVLDWDRNYHGY  | TLQGT   | TTYNAYLV   | CGDEGV | ALIN  | NSYPG | TFDELMAR | EDALQGVGMR              |
| Flv2         | TKVLRSLWDRLLKFE   | VEYGRRR | TTNSNYLI   | QA.DH. | TALID | PPGES | FCDLIAEL | PKYLDLA...QLD           |
| Flv4         | TTAIRCLDWRDRDFD   | IEFELRH | GTTSNSFLI  | RG.EK. | TALID | TSHRK | FEAVYLQ  | LDLQDLV...SLD           |
| 1YCF         | IYWVGAVDWNIIRYFHG | PAFSTR  | HRTTNSNYLI | VD.DK. | TALVD | TVYEP | FKELIAK  | LKQIKDPV...KLD          |
| 1E5D         | FHLVGAIDWNSRDFH   | GYTLSP  | MTTNSNYLI  | ED.EK. | TTLFD | TVKAE | YKGEEL   | LCGLASV...IDPK...KID    |
| 2Q9U         | VYWVGVLDWVIRIFH   | GYHTD   | GSYNYFI    | DD.EC. | PTVD  | SVKYP | FAEEL    | LSRIAAC...CPLD...KIK    |
| 1VME         | IYVLRIDDRIRYFE    | AVWEIP  | GTISYNYLV  | KLNGA. | NVLID | GWKGN | YAKFID   | ALSKIVDPK...EIT         |
| B7KDC6_CYAP7 | TTVLRSRWDRLLKFE   | VEYSRQ  | GTANSYLI   | KS.DR. | IALID | PPGES | FTQIFL   | LEELQQH...LPLN...QLD    |
| B4WPZ4_9SYNE | TTVLRSRWDRLLKFE   | VEYSRQ  | GTANSYLI   | QS.DR. | TALID | PPGAS | FTSIFL   | QAIQPYLEET...PLD        |
| Q8YNW7_NOSS1 | TLILRSRTWDRLLKFE  | VEYSRQ  | RGTANSYLI  | QA.DK. | KALID | PPGES | FTAIY    | LEQLAQY...LDFE...TLD    |
| A0ZHS9_NODSP | TLMLRSRTWDRLLKFE  | IEYSRQ  | RGTANSYLI  | QA.DK. | KALID | PPGES | FTAIY    | LEQLAQH...LDFI...SLD    |
| Q3MDE3_ANAVT | TLILRSRTWDRLLKFE  | VEYSRQ  | RGTANSYLI  | QA.DK. | KALID | PPGES | FTAIY    | LEQLAQY...LDFE...TLD    |
| B4W3S4_9CYAN | TTVLRSRTWDRLLKFE  | VEYSLQ  | RGTANSYLI  | QA.DK. | TALID | PPGES | FTEIFL   | TLQQC...LQV...QLD       |
| B0JX17_MICAN | TWVFRSRTWDRLLKFE  | IEYARQ  | RGTANSYLI  | CG.DK. | TALID | PPGES | FTEIY    | LEELRQY...INSH...RLD    |
| Q117X8_TRIEI | TKVLRSRTWDRLLKFE  | VEYSLQ  | RGTANSYLI  | QG.EK. | TAVID | PPGES | FTQNY    | LESELQRL...LDLH...RLD   |
| Q8DJ55_THEEB | LVVLRSRTWDRLLKFE  | VEYGRQ  | GTANSYLI   | QA.PQ. | PALLD | PPGES | FTIY     | LELQRI...LDLN...QLR     |
| A0YMD6_LYNP  | TKVLRSRTWDRLLKFE  | VEYSLQ  | RGTANSYLI  | QA.EH. | TALID | PPGES | FTRNY    | IEALQMR...LNWS...KLN    |
| B4WPZ3_9SYNE | TTALRCLDWRDRDFD   | IEFELK  | NGTTSNSFLI | RG.EK. | TALVD | TSHSK | FRQYQ    | VEYLNRN...VDPQ...ALT    |
| Q3MDE1_ANAVT | TTAIRCLDWRDRDFD   | IEFGLR  | NGTTSNSFLI | QG.EK. | IALVD | TSHRK | FEKLY    | LEIVAGL...IDPN...TID    |
| B1WP02_CYAA5 | TTAIRCLDWRDRDFD   | IEFGLR  | NGTTSNSFLI | EG.EK. | TALVD | TSHGK | FRQLY    | LDLCKLD...IDLS...TLD    |
| Q2JPB3_SYNJ5 | TLAIRSQDWRDRDFD   | IEFALEN | GTTSNSFLI  | RG.EK. | VALID | TSHK  | FRQLY    | LDLQGLDPA...QID         |
| Q8YNW5_NOSS1 | TTAIRCLDWRDRDFD   | IEFGLR  | NGTTSNSFLI | KG.EK. | IALVD | TSHRK | FEKLY    | LEIVAGL...IDPN...TID    |
| A0ZHS8_NODSP | TTAIRCLDWRDRDFD   | VEFGLR  | NGTTSNSFLI | QG.EK. | IALVD | TSHRK | FEELY    | LEIVAGL...IDPN...KID    |
| Q8YQD8_NOSS1 | TTAIRSLDWRDRDFD   | IEFGLQ  | NGTTSNSFLI | RG.EQ. | IALVD | TSHK  | FRQLY    | LDLTKGL...INPT...EIN    |
| B4VHN3_9CYAN | TTTIRSLDWRDRDFD   | IEFGLQ  | NGTTSNSFLI | RG.EK. | IALVD | TSHK  | FRQLY    | LDLTKGL...IEPS...QID    |
| Q119P3_TRIEI | TMAIRSLDWRDRDFD   | IEFGLQ  | NGTTSNSFLI | QG.EK. | TALVD | TSHGK | FRQLY    | LDLTKGL...IKPT...EID    |
| B0JX19_MICAN | TFTLRCLDWRDRDFD   | IEFGLN  | GTTSNSFVI  | QG.EK. | TALID | TSHRK | FRQLY    | LEELTKL...ININ...HLD    |
| Q8DJY2_THEEB | TTAIRCLDWRDRDFD   | IEFALEN | GTTSNSFLI  | KG.ER. | IALVD | TSHAK | FGDRY    | LELQVLPNS...DLD         |
| Q7VBG8_PROMA | TTAIRSLDWRDRDFD   | IEFGLR  | NGTTSNSFLI | QG.EK. | TALID | SSHVK | FRS      | TWVDAITKCI...IDPK...TLD |

| 20H1         | β9               | α2     | α3     | β10    | α4      | η1    | β11    | β12     |
|--------------|------------------|--------|--------|--------|---------|-------|--------|---------|
|              | 80               | 90     | 100    | 110    | 120     | 130   |        |         |
| 20H1         | YIQNHVEKDHSGVLVE | LHRRFP | EAP    | IYCTE  | VAVKGLL | KHYP  | SLREAE | FVMVKTG |
| Flv2         | YIVASHVNP        | NRMVTL | EQLLR  | RATKAK | LICSR   | PAKV  | LKATFP | HWEE    |
| Flv4         | YLVVNHTE         | PDHSG  | LIPD   | LELAP  | QVTVV   | GSKV  | AIQFLE | KLV     |
| 1YCF         | YLVVNHTE         | SDHAG  | AFPA   | IME    | LCPD    | AVLTC | QR     | AFD     |
| 1E5D         | YLVVNHTE         | LELDH  | AGAL   | PALIE  | ACQPEK  | IF    | TSS    | LQK     |
| 2Q9U         | YVVMNHAE         | GDH    | ASSL   | KDHYH  | KFTNAT  | FV    | CT     | KK      |
| 1VME         | HIIVNHTE         | PDHSG  | SLPAT  | LKTI   | GHDF    | VEI   | JAN    | FGK     |
| B7KDC6_CYAP7 | YIILGHV          | NPNRMA | TVKVL  | IQOAP  | QVKL    | ICSK  | PAK    | LLKN    |
| B4WPZ4_9SYNE | YIIVSHV          | NPNRMV | TLAAL  | EQQP   | EAVI    | ICSR  | PAQA   | IEA     |
| Q8YNW7_NOSS1 | YIILGHV          | NPNRRV | TLQEL  | LSKAP  | QATL    | ICSR  | PAAN   | ALKT    |
| A0ZHS9_NODSP | YIILGHV          | NPNRRV | TLQEL  | LSKAP  | QATL    | ICSR  | PAAN   | ALKT    |
| Q3MDE3_ANAVT | YIILGHV          | NPNRRV | TLQEL  | LSKAP  | QATL    | ICSR  | PAAN   | ALKT    |
| B4W3S4_9CYAN | YVILGHV          | NPNRMV | TLKAL  | LELAP  | QITF    | CSKA  | GAV    | ALQN    |
| B0JX17_MICAN | YLILSHV          | NPNRIV | TLKAL  | LAATH  | QITL    | ICSK  | SAVN   | TLKN    |
| Q117X8_TRIEI | YVILGHV          | NANRGG | TLKEL  | LAIA   | PVTF    | VCSN  | PSV    | LNLD    |
| Q8DJ55_THEEB | YLILSHV          | NSRLA  | TVKVL  | LELAP  | QITL    | VCSN  | KAG    | AVTL    |
| A0YMD6_LYNP  | YIILGHV          | NANRGA | TIKALL | TLPAP  | QVTVV   | CSN   | PAAL   | ALKE    |
| B4WPZ3_9SYNE | YLIVNHTE         | PDHSG  | SLIED  | ILWAP  | HIVV    | GSKV  | AIQFLE | NMI     |
| Q3MDE1_ANAVT | YLII             | NHTE   | PDHSG  | SLVK   | DILQ    | LAP   | SITV   | GAKV    |
| B1WP02_CYAA5 | YLIVSHTE         | PDHSG  | SLVK   | DVLK   | LAP     | NMTV  | GSKV   | AIQFLE  |
| Q2JPB3_SYNJ5 | YLIVSHTE         | PDHSG  | SLVK   | DILQ   | LAP     | QVTVV | ASKV   | AVQFLE  |
| Q8YNW5_NOSS1 | YLIVSHTE         | PDHSG  | SLVK   | DILQ   | LAP     | NITV  | GAKV   | AIQFLE  |
| A0ZHS8_NODSP | YLIVSHTE         | PDHSG  | SLVK   | DILQ   | LAP     | EITV  | GSKV   | AIQFLE  |
| Q8YQD8_NOSS1 | YLII             | NHTE   | PDHSG  | SLVK   | DILQ    | LAP   | EITV   | GSKV    |
| B4VHN3_9CYAN | YLII             | NHTE   | PDHSG  | SLVK   | DILQ    | LAP   | EITV   | GSKV    |
| Q119P3_TRIEI | YLII             | NHTE   | PDHSG  | SLAK   | DILQ    | LAP   | QITV   | GAKV    |
| B0JX19_MICAN | YLII             | NHTE   | PDHSG  | SLVK   | DILQ    | LAP   | EITV   | GAKV    |
| Q8DJY2_THEEB | YLIVSHTE         | PDHSG  | SLVK   | DVLK   | LAP     | HVTV  | ASKV   | AMQFLE  |
| Q7VBG8_PROMA | FLIVSHTE         | PDHSG  | SLIS   | DILQ   | LNN     | DEIV  | GSKV   | AIQFLE  |

| 20H1         | β13      | β14   | β15  | η2   | α5   |
|--------------|----------|-------|------|------|------|
|              | 140      | 150   | 160  | 170  | 180  |
| 20H1         | ...G.KT  | LTFL  | ETPL | LHW  | PD   |
| Flv2         | ...RG.HK | LQLM  | ITP  | TPR  | WD   |
| Flv4         | ...QG.HE | LQFI  | ISAP | NLHW | PD   |
| 1YCF         | ...K.RS  | LTPI  | EAP  | NLHW | PD   |
| 1E5D         | ...K.RT  | VTFY  | ETR  | NLHW | PD   |
| 2Q9U         | ...K.RT  | LKFI  | IPV  | LLHW | PD   |
| 1VME         | ...G.KK  | FKFV  | IPV  | LLHW | PD   |
| B7KDC6_CYAP7 | ...GG.HQ | LQFI  | FVPT | PRW  | AD   |
| B4WPZ4_9SYNE | ...RG.HC | LQLI  | ITP  | TPR  | WD   |
| Q8YNW7_NOSS1 | ...QG.HQ | LTFV  | ITP  | TPR  | WD   |
| A0ZHS9_NODSP | ...QG.HH | LTPI  | ITP  | TPR  | WD   |
| Q3MDE3_ANAVT | ...QG.HQ | LTFT  | ITP  | TPR  | WD   |
| B4W3S4_9CYAN | ...QN.HQ | LQFI  | IPV  | LLHW | PD   |
| B0JX17_MICAN | ...QG.HQ | LSFIN | IPV  | LLHW | PD   |
| Q117X8_TRIEI | ...SG.HK | LQLL  | ITP  | TPR  | WD   |
| Q8DJ55_THEEB | ...GD.RQ | LMFIA | AAAT | TPR  | WD   |
| A0YMD6_LYNP  | ...NG.HQ | LQFI  | IAV  | PT   | PRW  |
| B4WPZ3_9SYNE | ...KG.HE | LSFV  | ISAP | NLHW | PD   |
| Q3MDE1_ANAVT | ...NG.HN | LEFV  | ISAP | NLHW | PD   |
| B1WP02_CYAA5 | ...QG.HE | LQFI  | ISAP | NLHW | PD   |
| Q2JPB3_SYNJ5 | ...KG.HV | LEFV  | ISAP | NLHW | PD   |
| Q8YNW5_NOSS1 | ...NG.HS | LEFV  | ISAP | NLHW | PD   |
| A0ZHS8_NODSP | ...ND.HQ | LEFV  | ISAP | NLHW | PD   |
| Q8YQD8_NOSS1 | ...NG.HE | FEFV  | ISAP | NLHW | PD   |
| B4VHN3_9CYAN | ...KG.HV | LEFV  | ISAP | NLHW | PD   |
| Q119P3_TRIEI | ...NG.HV | LEFV  | ISAP | NLHW | PD   |
| B0JX19_MICAN | ...NG.HI | LEFV  | ISAP | NLHW | PD   |
| Q8DJY2_THEEB | ...KG.HV | LEFV  | ISAP | NLHW | PD   |
| Q7VBG8_PROMA | PSNGI    | IHHK  | LDFI | ISAP | NLHW |

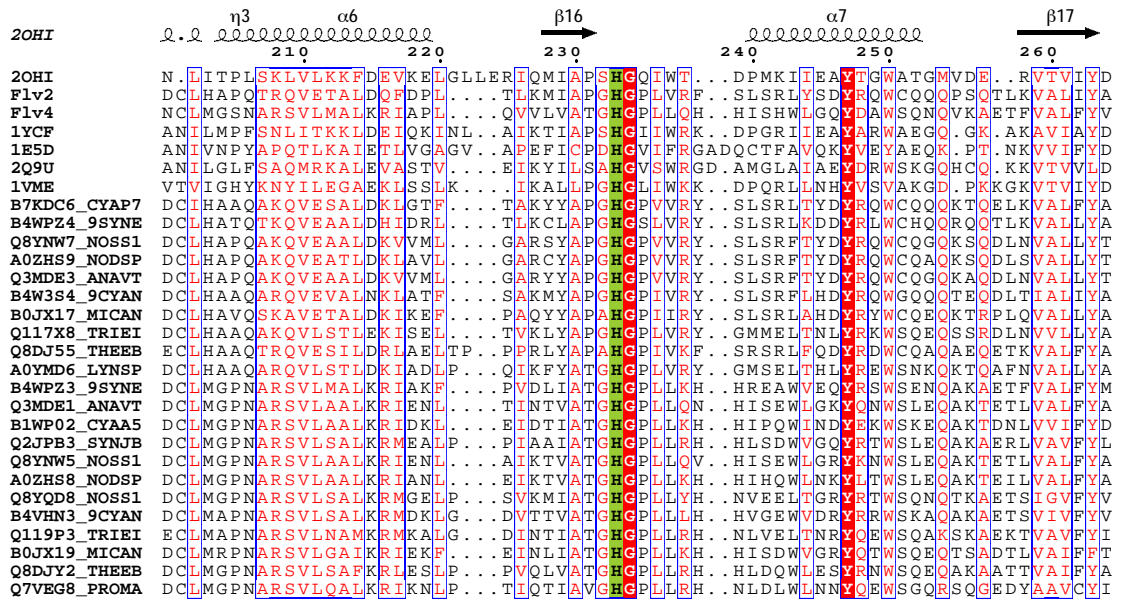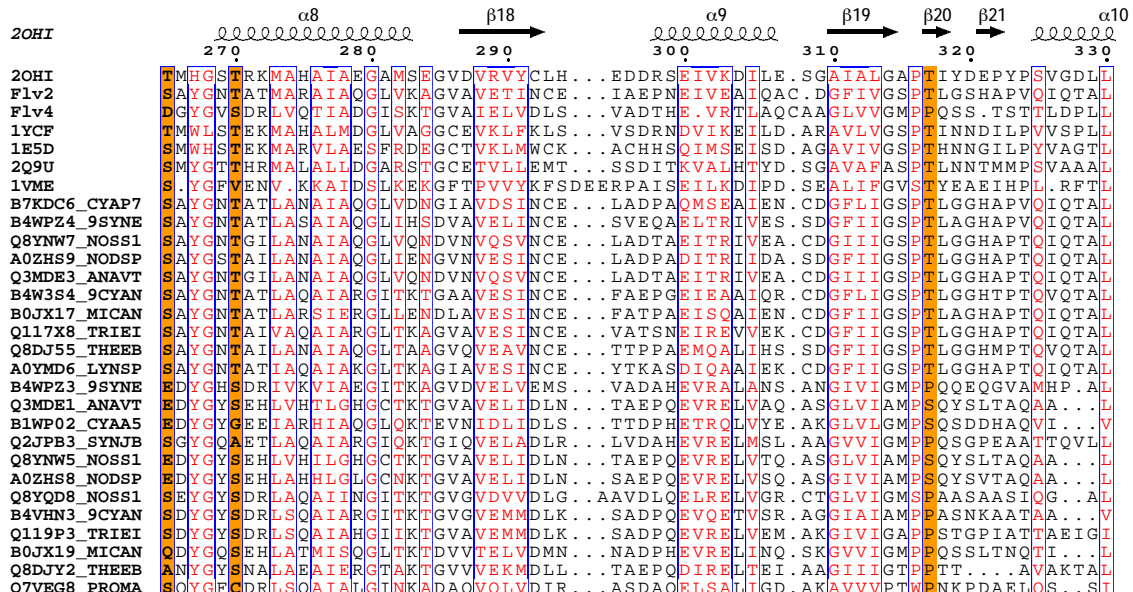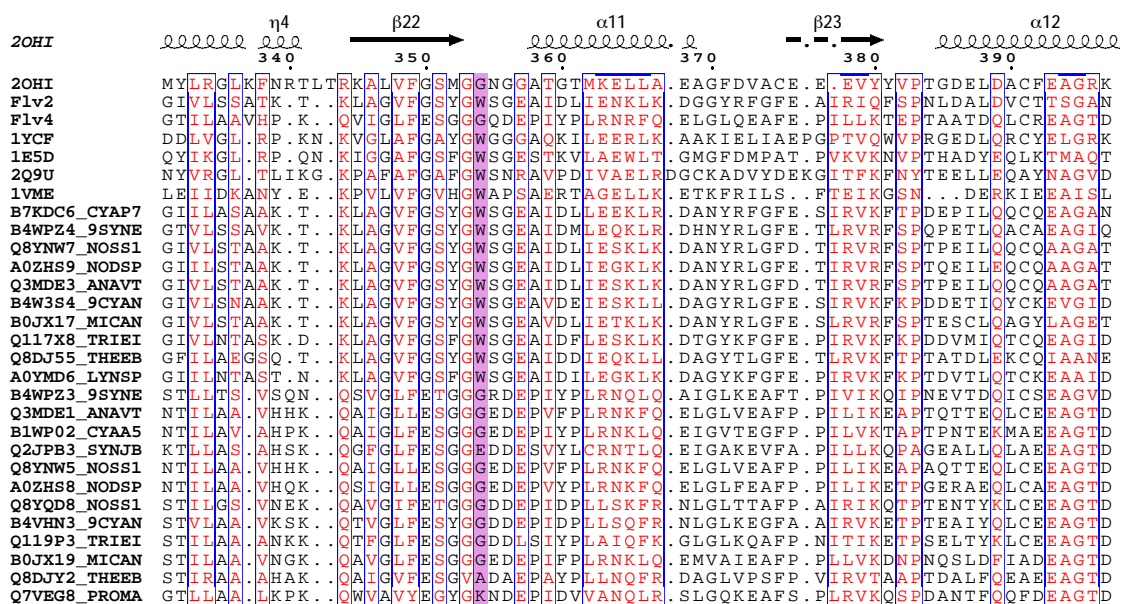

```

2OHI          0000
              400
2OHI          LAEIR
Flv2          FARLR
Flv4          LGQLT
1YCF          IARIA
1E5D          IARLR
2Q9U          LKRLAI
1VME          LKKELE
B7KDC6_CYAP7 FAQLK
B4WPZ4_9SYNE FAQLR
Q8YNW7_NOSS1 FAQLK
A0ZHS9_NODSP FAQLK
Q3MDE3_ANAVT FAQLK
B4W3S4_9CYAN FAQLK
B0JX17_MICAN FARTLR
Q117X8_TRIET FAQLI
Q8DJ55_THEEB FAQLK
A0YMD6_LYNRP FAQLR
B4WPZ3_9SYNE LAHQLT
Q3MDE1_ANAVT IGWLT
B1WP02_CYAA5 LGWLT
Q2JPB3_SYNJB LGWLT
Q8YNW5_NOSS1 IGWLT
A0ZHS8_NODSP MGWLT
Q8YQD8_NOSS1 LGWVT
B4VHN3_9CYAN MGQLT
Q119P3_TRIET AGLLS
B0JX19_MICAN LGWLS
Q8DJY2_THEEB MGWLL
Q7VEG8_PROMA LGLLN

```

**Supplemental Figure 6.** Multiple structure-based alignment of *Methanothermobacter marburgensis* F<sub>420</sub>H<sub>2</sub> oxidase (PDB ID: 2OHI), *Synechocystis* Flv2, *Synechocystis* Flv4, *Moorella thermoacetica* FprA (PDB ID: 1YCF), *Desulfovibrio gigas* rubredoxin oxygen:oxidoreductase (PDB ID: 1E5D), *Giardia intestinalis* flavoprotein (PDB ID: 2Q9U), *Thermotoga maritima* flavoprotein (PDB ID: 1VME). The amino acid numbering is according to Flv2. The cyanobacterial sequences are included with UniProt Knowledgebase accession codes. The secondary structure above the alignment is according to 2OHI. The switch loop is colored cyan, the iron-binding residues are green, and Trp corresponding to Trp371 in Flv2 is pink.



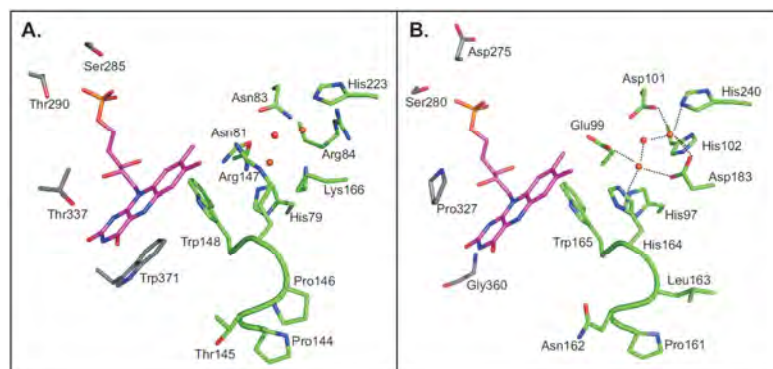

**Supplemental Figure 7.** The FMN and diiron binding sites of Flv2 and Flv4 homodimers.

**(A)** *Synechocystis* Flv2/Flv2 homodimer in closed formation.

**(B)** *Synechocystis* Flv4/Flv4 homodimer in closed formation.

**Supplemental Table 1.** Ratios of low temperature (77K) fluorescence yields of PBS, PSI and PSII ( $F_{685} + F_{695}$ ) of WT and various *flv* mutants excited at 580 nm light

| Strain                        | $F_{\text{PBS}}/F_{\text{PSII}}$ | $F_{\text{PBS}}/F_{\text{PSI}}$ | $F_{685}/F_{695}$ | $F_{695}/F_{\text{PSI}}$ | $F_{\text{PBS}}/F_{695}$ |
|-------------------------------|----------------------------------|---------------------------------|-------------------|--------------------------|--------------------------|
| WT                            | $1.50 \pm 0.03$                  | $1.24 \pm 0.02$                 | $0.38 \pm 0.03$   | $0.60 \pm 0.02$          | $2.06 \pm 0.04$          |
| $\Delta flv2$                 | $1.30 \pm 0.04$                  | $1.24 \pm 0.03$                 | $0.85 \pm 0.05$   | $0.51 \pm 0.02$          | $2.45 \pm 0.09$          |
| $\Delta sll0218-19$           | $1.12 \pm 0.03$                  | $1.25 \pm 0.03$                 | $0.96 \pm 0.04$   | $0.57 \pm 0.01$          | $2.18 \pm 0.06$          |
| $\Delta flv4$                 | $1.12 \pm 0.04$                  | $1.26 \pm 0.05$                 | $1.02 \pm 0.07$   | $0.57 \pm 0.02$          | $2.22 \pm 0.13$          |
| $\Delta sll0218-19/flag-flv4$ | $1.18 \pm 0.03$                  | $1.24 \pm 0.04$                 | $0.83 \pm 0.01$   | $0.58 \pm 0.01$          | $2.15 \pm 0.04$          |
| <i>flag-flv4</i>              | $1.68 \pm 0.10$                  | $1.19 \pm 0.08$                 | $0.44 \pm 0.05$   | $0.49 \pm 0.02$          | $2.42 \pm 0.13$          |

The quantification was performed from four independent measurements. The results are shown as mean value  $\pm$  SD. Peaks are indicated in Supplemental Figure 4.

**Supplemental Table 2.** Conserved metal binding sites on the Flv2/Flv4 heterodimer surface

| Metal binding site | Conserved residues in Flv2/Flv4 heterodimer                                                | Template                                           | Corresponding residues in template       |
|--------------------|--------------------------------------------------------------------------------------------|----------------------------------------------------|------------------------------------------|
| Ca <sup>2+</sup>   | Asp404, Glu400 in Flv4                                                                     | <i>Synechococcus sp.</i><br>flavodoxin-like domain | Asp 397, Glu393                          |
| Zn <sup>2+</sup>   | Glu80, Asp84 in Flv2<br>Glu148 in Flv2<br>Asp289 in Flv4                                   | <i>M. thermoacetica</i> FprA                       | Glu55, Glu59<br>Asp120<br>His271, Asp275 |
| putative           | His246, His247, His 250 in Flv4<br>His27, His153, Asp173 in Flv4<br>His143, Glu145 in Flv2 | -<br>-<br>-                                        | -<br>-<br>-                              |

**Supplemental Table 3.** Kinetic data of flash induced fluorescence relaxation components of  $\Delta psbA2$  and two *flv2* complemented strains grown at high and air level of CO<sub>2</sub>.

|                              | Fast          |          | Middle     |          | Slow       |          |
|------------------------------|---------------|----------|------------|----------|------------|----------|
|                              | T1 (ms)       | A1 (%)   | T2 (ms)    | A2 (%)   | T3 (s)     | A3 (%)   |
| High CO <sub>2</sub>         | No addition   |          |            |          |            |          |
| $\Delta psbA2$               | 0.443 ± 0.009 | 56 ± 0.8 | 3.4 ± 0.17 | 28 ± 1.0 | 17.3 ± 1.0 | 16 ± 0.3 |
| $\Delta flv4::flv2$          | 0.450 ± 0.025 | 57 ± 1.8 | 3.1 ± 0.22 | 28 ± 1.4 | 14.0 ± 0.4 | 15 ± 1.0 |
| $\Delta ssl0218-19::flv2$    | 0.394 ± 0.006 | 57 ± 1.4 | 2.9 ± 0.19 | 27 ± 1.1 | 17.1 ± 1.6 | 16 ± 0.7 |
|                              | + DBMIB       |          |            |          |            |          |
| $\Delta psbA2$               | 1.059 ± 0.094 | 46 ± 0.4 | 31.9 ± 1.3 | 36 ± 0.7 | 3.4 ± 0.4  | 18 ± 0.6 |
| $\Delta flv4::flv2$          | 1.135 ± 0.082 | 49 ± 1.3 | 34.9 ± 0.4 | 32 ± 2.0 | 4.7 ± 0.8  | 19 ± 0.7 |
| $\Delta ssl0218-19::flv2$    | 1.129 ± 0.131 | 51 ± 1.0 | 32.5 ± 1.2 | 30 ± 1.5 | 4.5 ± 0.4  | 19 ± 0.5 |
| Air level of CO <sub>2</sub> | No addition   |          |            |          |            |          |
| $\Delta psbA2$               | 0.634 ± 0.010 | 67 ± 1.3 | 9.3 ± 1.7  | 17 ± 1.6 | 5.0 ± 0.5  | 16 ± 0.4 |
| $\Delta flv4::flv2$          | 0.762 ± 0.042 | 54 ± 2.1 | 8.7 ± 0.7  | 19 ± 1.1 | 4.1 ± 0.8  | 27 ± 1.3 |
| $\Delta ssl0218-19::flv2$    | 0.482 ± 0.032 | 67 ± 0.3 | 7.2 ± 1.0  | 18 ± 1.2 | 2.4 ± 0.4  | 15 ± 1.0 |
|                              | + DBMIB       |          |            |          |            |          |
| $\Delta psbA2$               | 0.757 ± 0.016 | 53 ± 1.4 | 29.1 ± 1.3 | 29 ± 1.0 | 1.3 ± 0.1  | 18 ± 0.4 |
| $\Delta flv4::flv2$          | 0.995 ± 0.025 | 39 ± 1.2 | 27.1 ± 0.3 | 29 ± 1.3 | 0.7 ± 0.1  | 32 ± 2.0 |
| $\Delta ssl0218-19::flv2$    | 0.637 ± 0.007 | 48 ± 1.2 | 23.4 ± 1.0 | 30 ± 1.8 | 0.5 ± 0.1  | 22 ± 1.4 |
